# Supplementary material for: Terrestrial Inputs Shape Coastal Bacterial and Archaeal Communities in a High Arctic Fjord (Isfjorden, Svalbard)
Source: Frontiers journal article supplement (doi:10.3389/fmicb.2021.614634), 2021-02-26
Supplement: Data_Sheet_10.PDF [file Data_Sheet_10.PDF]

**Supplementary Table S4** | Statistical outputs for pairwise comparisons of alpha diversity indices giving FDR-corrected *p*-values for Dunn's *post hoc* test performed on a Kruskal-Wallis test to account for non-gaussian repartitions. **(A)** Comparisons of groups separating habitat and month in the water column. **(B)** Comparisons of groups separating water type. These tests correspond to the ones represented on the **Supplementary Figure S1** and **S2**. Significant *p*-values are written in black.

A

| Comparisons       | nOTU                   | Chao1                  | ACE                    | Pielou's evenness      | Shannon                | Inverse Simpson's      | Relative singletons    |
|-------------------|------------------------|------------------------|------------------------|------------------------|------------------------|------------------------|------------------------|
| August - June     | 1,58.10 <sup>-02</sup> | 1,55.10 <sup>-03</sup> | 1,77.10 <sup>-03</sup> | 6,81.10 <sup>-04</sup> | 9,66.10 <sup>-03</sup> | 8,20.10 <sup>-04</sup> | 2,00.10 <sup>-03</sup> |
| August - River    | 7,14.10 <sup>-06</sup> | 3,05.10 <sup>-04</sup> | 5,98.10 <sup>-04</sup> | 4,82.10 <sup>-04</sup> | 1,38.10 <sup>-04</sup> | 5,19.10 <sup>-04</sup> | 5,10.10 <sup>-04</sup> |
| June - River      | 2,15.10 <sup>-03</sup> | 1,00.10 <sup>-01</sup> | 1,31.10 <sup>-01</sup> | 6,42.10 <sup>-09</sup> | 3,48.10 <sup>-08</sup> | 9,16.10 <sup>-09</sup> | 2,77.10 <sup>-08</sup> |
| August - Sediment | 2,38.10 <sup>-07</sup> | 9,16.10 <sup>-07</sup> | 2,35.10 <sup>-06</sup> | 3,20.10 <sup>-05</sup> | 8,49.10 <sup>-06</sup> | 1,13.10 <sup>-05</sup> | 1,30.10 <sup>-03</sup> |
| June - Sediment   | 3,61.10 <sup>-04</sup> | 9,52.10 <sup>-03</sup> | 1,45.10 <sup>-02</sup> | 8,37.10 <sup>-12</sup> | 1,35.10 <sup>-10</sup> | 2,12.10 <sup>-12</sup> | 2,35.10 <sup>-08</sup> |
| River - Sediment  | 4,47.10 <sup>-01</sup> | 2,44.10 <sup>-01</sup> | 2,39.10 <sup>-01</sup> | 4,23.10 <sup>-01</sup> | 4,48.10 <sup>-01</sup> | 3,43.10 <sup>-01</sup> | 2,83.10 <sup>-01</sup> |

B

| Comparisons             | nOTU                   | Chao1                  | ACE                    | Pielou's evenness      | Shannon                | Inverse Simpson's      | Relative singletons    |
|-------------------------|------------------------|------------------------|------------------------|------------------------|------------------------|------------------------|------------------------|
| AdW - Estuary SW        | 2,24.10 <sup>-02</sup> | 8,02.10 <sup>-03</sup> | 4,65.10 <sup>-03</sup> | 4,93.10 <sup>-01</sup> | 3,26.10 <sup>-01</sup> | 4,99.10 <sup>-01</sup> | 6,90.10 <sup>-02</sup> |
| AdW - Fjord SW          | 3,11.10 <sup>-01</sup> | 3,22.10 <sup>-01</sup> | 3,49.10 <sup>-01</sup> | 1,06.10 <sup>-01</sup> | 7,83.10 <sup>-02</sup> | 1,62.10 <sup>-01</sup> | 2,15.10 <sup>-01</sup> |
| Estuary SW - Fjord SW   | 1,01.10 <sup>-02</sup> | 3,83.10 <sup>-03</sup> | 2,73.10 <sup>-03</sup> | 1,20.10 <sup>-01</sup> | 4,13.10 <sup>-02</sup> | 1,80.10 <sup>-01</sup> | 2,60.10 <sup>-01</sup> |
| AdW - Glacier SW        | 3,95.10 <sup>-01</sup> | 3,17.10 <sup>-01</sup> | 2,90.10 <sup>-01</sup> | 1,94.10 <sup>-01</sup> | 2,03.10 <sup>-01</sup> | 1,77.10 <sup>-01</sup> | 2,64.10 <sup>-01</sup> |
| Estuary SW - Glacier SW | 1,31.10 <sup>-01</sup> | 1,16.10 <sup>-01</sup> | 1,05.10 <sup>-01</sup> | 2,00.10 <sup>-01</sup> | 1,34.10 <sup>-01</sup> | 1,86.10 <sup>-01</sup> | 3,41.10 <sup>-01</sup> |
| Fjord SW - Glacier SW   | 2,76.10 <sup>-01</sup> | 2,19.10 <sup>-01</sup> | 2,12.10 <sup>-01</sup> | 4,89.10 <sup>-01</sup> | 4,31.10 <sup>-01</sup> | 4,15.10 <sup>-01</sup> | 4,74.10 <sup>-01</sup> |
| AdW - River             | 3,50.10 <sup>-05</sup> | 3,08.10 <sup>-03</sup> | 4,07.10 <sup>-03</sup> | 4,37.10 <sup>-05</sup> | 3,15.10 <sup>-05</sup> | 4,20.10 <sup>-05</sup> | 1,77.10 <sup>-04</sup> |
| Estuary SW - River      | 1,94.10 <sup>-02</sup> | 2,87.10 <sup>-01</sup> | 3,77.10 <sup>-01</sup> | 1,14.10 <sup>-04</sup> | 3,45.10 <sup>-04</sup> | 1,04.10 <sup>-04</sup> | 2,00.10 <sup>-06</sup> |
| Fjord SW - River        | 1,56.10 <sup>-05</sup> | 1,49.10 <sup>-03</sup> | 2,39.10 <sup>-03</sup> | 1,04.10 <sup>-06</sup> | 3,52.10 <sup>-07</sup> | 2,86.10 <sup>-06</sup> | 2,78.10 <sup>-05</sup> |
| Glacier SW - River      | 4,01.10 <sup>-03</sup> | 5,94.10 <sup>-02</sup> | 7,74.10 <sup>-02</sup> | 1,38.10 <sup>-04</sup> | 1,24.10 <sup>-04</sup> | 1,06.10 <sup>-04</sup> | 7,56.10 <sup>-04</sup> |
| AdW - Sediment          | 1,86.10 <sup>-06</sup> | 4,68.10 <sup>-05</sup> | 6,65.10 <sup>-05</sup> | 1,74.10 <sup>-06</sup> | 1,63.10 <sup>-06</sup> | 4,76.10 <sup>-07</sup> | 4,35.10 <sup>-04</sup> |
| Estuary SW - Sediment   | 7,43.10 <sup>-03</sup> | 8,19.10 <sup>-02</sup> | 1,28.10 <sup>-01</sup> | 8,65.10 <sup>-06</sup> | 4,71.10 <sup>-05</sup> | 2,61.10 <sup>-06</sup> | 3,87.10 <sup>-06</sup> |
| Fjord SW - Sediment     | 9,72.10 <sup>-07</sup> | 2,46.10 <sup>-05</sup> | 4,57.10 <sup>-05</sup> | 2,21.10 <sup>-08</sup> | 8,46.10 <sup>-09</sup> | 2,21.10 <sup>-08</sup> | 6,45.10 <sup>-05</sup> |
| Glacier SW - Sediment   | 1,76.10 <sup>-03</sup> | 1,31.10 <sup>-02</sup> | 1,83.10 <sup>-02</sup> | 2,98.10 <sup>-05</sup> | 3,27.10 <sup>-05</sup> | 1,03.10 <sup>-05</sup> | 1,91.10 <sup>-03</sup> |
| River - Sediment        | 4,47.10 <sup>-01</sup> | 2,44.10 <sup>-01</sup> | 2,39.10 <sup>-01</sup> | 4,23.10 <sup>-01</sup> | 4,48.10 <sup>-01</sup> | 3,43.10 <sup>-01</sup> | 2,83.10 <sup>-01</sup> |
